# Supplementary material
Source: PubMed Central journal article supplement (PMC8068423)
Supplement: ocaa349_supplementary_data.pdf [file ocaa349_supplementary_data.pdf]

Supplemental Tables: Impact of EHR and Clerical Work on Burnout

Table 1: Average Burnout Scores by Personal, Professional Characteristics and EHR & Clerical Burden (Bivariate)

|                                                      | MBI-2 Burnout Score<br>Max= 12<br>Mean (std) | P value             | WBI Burnout Score<br>Max=7<br>Mean (std) | P value             |
|------------------------------------------------------|----------------------------------------------|---------------------|------------------------------------------|---------------------|
| Total                                                | 4.01 (3.20)                                  |                     | 2.76 (1.93)                              |                     |
| <b>Demographics and Professional Characteristics</b> |                                              |                     |                                          |                     |
| Gender                                               |                                              |                     |                                          |                     |
| Female                                               | 4.37 (3.22)                                  | p<.001 <sup>a</sup> | 3.01 (1.85)                              | p<.001 <sup>a</sup> |
| Male                                                 | 3.55 (3.07)                                  |                     | 2.39 (1.92)                              |                     |
| Non-binary/third gender/other                        | 5.00 (3.56)                                  |                     | 3.604 (2.00)                             |                     |
| Age                                                  |                                              |                     |                                          |                     |
| 20-39                                                | 4.81 (3.08)                                  | p<.001 <sup>a</sup> | 3.14 (1.84)                              | p<.001 <sup>a</sup> |
| 40-59                                                | 4.00 (3.23)                                  |                     | 2.77 (1.91)                              |                     |
| 60+                                                  | 2.545 (2.76)                                 |                     | 1.91 (1.84)                              |                     |
| Faculty Level                                        |                                              |                     |                                          |                     |
| Instructor/other                                     | 4.161 (3.40)                                 | p<.001 <sup>a</sup> | 2.93 (1.85)                              | p<.001 <sup>a</sup> |
| Assistant Prof                                       | 4.41 (3.20)                                  |                     | 2.92 (1.89)                              |                     |
| Associate Prof/Professor                             | 3.29 (3.00)                                  |                     | 2.34 (1.94)                              |                     |
| Full-time Status                                     |                                              |                     |                                          |                     |
| Full-time                                            | 4.09 (3.23)                                  | p=.02 <sup>a</sup>  | 2.81 (1.93)                              | p<.001 <sup>a</sup> |
| Part time (Any %)                                    | 3.42 (2.96)                                  |                     | 2.12 (1.76)                              |                     |
| % Time Spent on Clinical Care                        |                                              |                     |                                          |                     |
| 1-40%                                                | 3.50 (3.11)                                  | p=.003 <sup>a</sup> | 2.46 (1.87)                              | p=.004 <sup>a</sup> |
| 41-60%                                               | 4.05 (3.01)                                  |                     | 2.97 (1.97)                              |                     |
| 61-100%                                              | 4.23 (3.28)                                  |                     | 2.81 (1.93)                              |                     |

|                                                     |                                           |                     |                                           |                     |
|-----------------------------------------------------|-------------------------------------------|---------------------|-------------------------------------------|---------------------|
| Hours worked per week<br><40<br>41-60<br>>60        | 3.88 (3.38)<br>3.84 (3.09)<br>4.30 (3.25) | p=.08               | 2.42 (1.87)<br>2.60 (1.87)<br>3.08 (1.98) | p<.001 <sup>a</sup> |
| Department<br>Primary Care<br>All Others            | 4.743 (3.254)<br>3.905 (3.176)            | p=.002 <sup>a</sup> | 3.01 (1.88)<br>2.72 (1.93)                | p=.07               |
| Medicine/Pediatrics Specialty<br>All Others         | 3.87 (2.93)<br>4.04 (3.245)               | p=.45               | 2.86 (1.82)<br>2.74 (1.95)                | p=.38               |
| Surgery<br>All Others                               | 4.089 (3.38)<br>4.00 (3.17)               | p=.74               | 2.90 (2.12)<br>2.74 (1.90)                | p=.34               |
| Hospital and Emergency Med<br>All Others            | 5.00 (3.18)<br>3.89 (3.18)                | p<.00 <sup>a</sup>  | 3.14 (1.91)<br>2.71 (1.93)                | p=.01 <sup>a</sup>  |
| Anesthesia/Radiology/Pathology<br>All Others        | 3.10 (2.91)<br>4.17 (3.22)                | p<.001 <sup>a</sup> | 2.12 (1.83)<br>2.87 (1.92)                | p<.001 <sup>a</sup> |
| Other Specialties<br>All Others                     | 3.40 (3.08)<br>4.14 (3.21)                | p=.002 <sup>a</sup> | 2.34 (1.88)<br>2.84 (1.93)                | p<.001 <sup>a</sup> |
| Other Department<br>All Others                      | 4.25 (3.23)<br>4.00 (3.20)                | p=.50               | 2.720 (3.20)<br>2.759 (1.93)              | p=.86               |
| <b>EHR and Clerical Work</b>                        |                                           |                     |                                           |                     |
| Daily Clerical Work Time (min)<br><=60<br>>60       | 3.66 (3.03)<br>5.12 (3.44)                | p<.001 <sup>a</sup> | 2.56 (1.86)<br>3.39 (1.99)                | p<.001 <sup>a</sup> |
| Daily EHR Time Outside Work<br>(min)<br><=90<br>>90 | 3.77 (3.11)<br>4.89 (3.34)                | p<.001 <sup>a</sup> | 2.60 (1.86)<br>3.30 (2.03)                | p<.001 <sup>a</sup> |

|                                                             |                             |                     |                              |                     |
|-------------------------------------------------------------|-----------------------------|---------------------|------------------------------|---------------------|
| EHR frustration<br>Agree<br>Disagree/neutral                | 4.58 (3.30)<br>3.44 (2.98)  | p<.001 <sup>a</sup> | 3.08 (1.94)<br>2.44 (1.85)   | p<.001 <sup>a</sup> |
| Practice Unloads Clerical Work<br>Agree<br>Disagree/neutral | 3.48 (2.89)<br>4.60 (3.389) | p<.001 <sup>a</sup> | 2.56 (1.89)<br>2.99 (1.94)   | p<.001 <sup>a</sup> |
| <b>Depression, Meaning and Resilience</b>                   |                             |                     |                              |                     |
| Depression<br>Yes<br>No                                     | 6.41 (3.27)<br>3.31 (2.81)  | p<.001 <sup>a</sup> | 4.89 (1.46)<br>2.15 (1.58)   | p<.001 <sup>a</sup> |
| Meaning in work<br>Agree<br>Neutral/disagree                | 3.82 (3.08)<br>7.13 (3.59)  | p<.001 <sup>a</sup> | 2.699 (1.90)<br>3.871 (2.08) | p<.001 <sup>a</sup> |
| Resilience (CD-RISC-2) (Pearson<br>Corr)                    | -0.22                       | p<.001 <sup>a</sup> | -0.21                        | p<.001 <sup>a</sup> |

CD-RISC-2 = Conner-Davidson Resilience Scale 2 item; EHR = Electronic health record; MBI-2 = Maslach Burnout Inventory 2 item; WBI = Mayo Well-Being Index; PS = Professional Satisfaction (Overall I am satisfied with my job), PHQ-2 = Patient Health Questionnaire 2 item; WLI = Work-life integration (My work schedule leaves enough time for my personal/family life)

<sup>a</sup> T-tests for dichotomous predictors and the Levene's test for equal variance p-value assessment, significant p value <.05. Anova tests for predictors with more than 2 groups and post-hoc analyses, Tukey's HSD (equal variances) and Dunnett's T3 (equal variance not assumed) tests completed with Bonferroni correction for p value for multiple comparisons, significant p value <.008.

Supplemental Table 2: Average Burnout Scores by Personal, Professional Characteristics and EHR & Clerical Burden (Multivariable)

|                    | MBI-2 Burnout<br>Coefficient [95% CI] | P Value | WBI Burnout<br>Coefficient [95% CI] | P Value |
|--------------------|---------------------------------------|---------|-------------------------------------|---------|
| Adjusted R Square  | 0.32                                  |         | 0.20                                |         |
| Gender (ref: Male) |                                       |         |                                     |         |

|                                         |                      |                     |                      |                     |
|-----------------------------------------|----------------------|---------------------|----------------------|---------------------|
| Female                                  | 0.42 [0.09, 0.77]    | p=.01aa             | 0.49 [0.27, 0.71]    | p<.001aa            |
| Non-binary/third Gender                 | 0.30 [-0.56, 1.16]   | p=.49               | 0.68 [0.11, 1.24]    | p=.02aa             |
| Age (ref: 20-39 yo)                     |                      |                     |                      |                     |
| 40-59 yo                                | -.54 [-0.93, -0.14]  | p=.008 <sup>a</sup> | -0.29 [-0.54, -0.03] | p=.03 <sup>a</sup>  |
| >60 yo                                  | -1.58 [-2.15, -1.02] | p<.001 <sup>a</sup> | -0.86 [-1.23, -0.50] | p<.001 <sup>a</sup> |
| Part-time Status (ref:Full-time)        | -0.25 [-0.81, 0.30]  | p=.37               | -0.34 [-0.69, 0.02]  | p=.06               |
| Time Spent on Clinical Care (ref:1-40%) |                      |                     |                      |                     |
| 41-60%                                  | 0.09 [-0.39, 0.58]   | p=.71               | 0.40 [0.09, 0.72]    | p=.01 <sup>a</sup>  |
| 61-100%                                 | 0.47 [0.05, 0.88]    | p=.03 <sup>a</sup>  | 0.29 [0.02, 0.56]    | p=.04 <sup>a</sup>  |
| Hours worked/week (ref: <=40)           |                      |                     |                      |                     |
| 41-60                                   | 0.25 [-0.28, 0.77]   | p=.35               | 0.23 [-0.11, 0.56]   | p=.18               |
| >60                                     | 0.47 [-0.10, 1.05]   | p=.11               | 0.56 [0.20, 0.93]    | p=.003 <sup>a</sup> |
| Level (ref: Instructor/other)           |                      |                     |                      |                     |
| Assistant Professor                     | 0.52 [0.01, 1.04]    | p=.04 <sup>a</sup>  | 0.08 [-0.25, 0.41]   | p=.63               |
| Associate Professor/Professor           | 0.33 [-0.26, 0.92]   | p=.27               | 0.02 [-0.36, 0.41]   | p=.90               |
| Department                              |                      |                     |                      |                     |
| Primary Care                            | -0.23 [0.90, 0.43]   | p=.49               | -0.30 [-0.73, 0.12]  | p=.16               |
| Medicine/Pediatrics Specialty           | -0.64 [-1.29, 0.02]  | p=.06               | -0.33 [-0.74, 0.09]  | p=.12               |
| Surgery                                 | -0.65 [-1.33, 0.02]  | p=.06               | -0.29 [-0.72, 0.14]  | p=.18               |
| Hospital and Emergency Medicine         | 0.10 [-0.60, 0.80]   | p=.78               | 0.003 [-0.45, 0.45]  | p=.99               |

|                                                        |                      |                      |                      |                     |
|--------------------------------------------------------|----------------------|----------------------|----------------------|---------------------|
| Anesthesia, Radiology, Pathology                       | -1.05 [-1.74, -0.37] | p=.003 <sup>a</sup>  | -0.72 [-1.15, -0.28] | p<.001 <sup>a</sup> |
| Other Specialties                                      | -1.10 [-1.74, -0.46] | P<0.001 <sup>a</sup> | -0.72 [-1.13, -0.31] | p<.001 <sup>a</sup> |
| Other                                                  | --                   | --                   |                      |                     |
| Depression (PHQ-2)                                     | 2.33 [1.93, 2.73]    | p<.001 <sup>a</sup>  | -                    | -                   |
| Resilience (CD-RISC-2)                                 | -0.29 [-0.42, -0.16] | p<.001 <sup>a</sup>  | -0.26 [-0.35, -0.18] | p<.001 <sup>a</sup> |
| Meaning in Work (ref: disagree/neutral)                | -1.69 [-2.38, -1.00] | p<.001 <sup>a</sup>  | -0.66 [-1.11, -0.21] | p=.004 <sup>a</sup> |
| <b>EHR and Clerical Burden</b>                         |                      |                      |                      |                     |
| Practice Unloads Clerical Work (ref: disagree/neutral) | -0.73 [-1.06, -0.40] | p<.001 <sup>a</sup>  | -0.28 [-0.49, -0.06] | p=.01 <sup>a</sup>  |
| Frustration with EHR<br>(ref: Disagree/neutral)        | 0.65 [0.31, 0.99]    | p<.001 <sup>a</sup>  | 0.42 [0.20, 0.64]    | p<.001 <sup>a</sup> |
| EHR Time Outside Work (ref:<=90 min)                   | 0.35 [-0.06, 0.76]   | p=.09                | 0.22 [-0.05, 0.48]   | p=.11               |
| Time on Clerical Work/day (ref:<=60 min)               | 0.65 [0.26, 1.04]    | p<.001 <sup>a</sup>  | 0.38 [0.13, 0.64]    | p=.003 <sup>a</sup> |

CD-RISC-2 = Conner-Davidson Resilience Scale 2 item; EHR = Electronic health record; MBI-2 = Maslach Burnout Inventory 2 item; WBI = Mayo Well-Being Index; PS = Professional Satisfaction (Overall I am satisfied with my job), PHQ-2 = Patient Health Questionnaire 2 item; WLI = Work-life integration (My work schedule leaves enough time for my personal/family life)

<sup>a</sup> Multivariable Linear Regression; significant factors with p value < 0.05
